# Supplementary material for: Ibrutinib treatment improves T cell number and function in CLL patients
Source: JCI journal article supplement (doi:10.1172/jci89756), 2017-07-16
Supplement: sd2 [file 2]

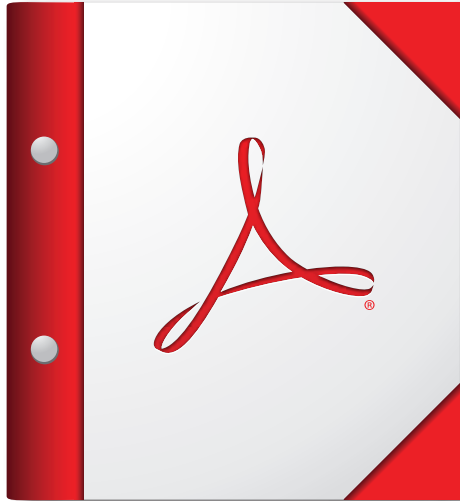

**For the best experience, open this PDF portfolio in  
Acrobat X or Adobe Reader X, or later.**

[Get Adobe Reader Now!](#)
